# Supplementary material for: A Closed-Form Approximation for Serial Inventory Systems and Its Application to System Design
Source: Atypon-hosted journal article supplement (doi:10.1287/msom.1060.0114), 2006-09-26
Supplement: msom.1060.0114-sm-closed-form.pdf [file msom.1060.0114-sm-closed-form.pdf]

Online Companion to  
 “A Closed-Form Approximation for Serial Inventory Systems and  
 Its Application to System Design”

Kevin H. Shang • Jing-Sheng Song

*The Fuqua School of Business, Duke University, Durham, North Carolina 27708, USA*  
*khshang@duke.edu • jssong@duke.edu*

---

**Appendix: Proofs**

**Proposition 6**

Without loss of generality, we assume  $L_{[1,N]} = 1$  and  $h_{[1,N]} = 1$ . Thus equal leadtimes and holding costs implies  $L_j = 1/N$  and  $h_j = 1/N$  for all  $j$ . In this case, (12) becomes

$$\xi_j = \frac{2(j\beta + (N - j))}{(1 - \beta)(j + 1)}$$

and (13) becomes

$$s_j^{\prime a} = \frac{\lambda}{N} + 0.617\sqrt{\frac{\lambda}{N}} \left[ \sqrt{j} \ln \left( \frac{2(j\beta + (N - j))}{(1 - \beta)(j + 1)} \right) - \sqrt{j - 1} \ln \left( \frac{2(j - 1)\beta + (N - j + 1)}{j(1 - \beta)} \right) \right].$$

To show  $s_{j+1}^{\prime a} < s_j^{\prime a}$ , it is equivalent to show  $f(j) \stackrel{def}{=} \sqrt{j} \ln(\xi_j)$  is concave in  $j$ .

Define the continuous extension of  $f(j)$  on the real interval  $[1, N]$  as

$$\begin{aligned} f(x) &= \sqrt{x} \ln \left( \frac{2(\beta x + (N - x))}{(1 - \beta)(1 + x)} \right) \\ &= \sqrt{x} \left( \ln \left( \frac{2}{1 - \beta} \right) + \ln((\beta - 1)x + N) - \ln(1 + x) \right). \end{aligned}$$

We now take the second derivative of each term in  $f(x)$  with respect to the continuous variable  $x$ . Let  $f_1(x) \stackrel{def}{=} \sqrt{x} \ln \left( \frac{2}{1 - \beta} \right)$ . Then,  $f_1''(x) = -\frac{1}{4}x^{-3/2} \ln \left( \frac{2}{1 - \beta} \right) < 0$ . Next, let  $f_2(x) \stackrel{def}{=} \sqrt{x} \ln(\beta x + N - x)$ . Then,

$$\begin{aligned} f_2''(x) &= -\frac{1}{4}x^{-3/2} \ln(\beta x + N - x) + \frac{1}{2}x^{-1/2} \frac{\beta - 1}{\beta x + N - x} \\ &\quad + (\beta - 1) \left( \frac{\frac{1}{2}x^{-1/2}(\beta x + N - x) - (\beta - 1)\sqrt{x}}{(\beta x + N - x)^2} \right) < 0. \end{aligned}$$

Further, let  $f_3(x) \stackrel{def}{=} \sqrt{x} \ln(x+1)$ . Then

$$f_3''(x) = \frac{1}{\sqrt{x}} \left( \frac{4x - (1+x)^2 \ln(1+x)}{4x(1+x)^2} \right).$$

Thus,  $f_3''(x) < 0$  when  $x \geq 2$ . Therefore, we have shown that when  $x \geq 2$ ,  $f(x)$  is concave in  $x$ . This implies that  $f(j) - f(j-1) > f(j+1) - f(j)$ ,  $j = 2, \dots, N-1$ . Thus, we have  $s_2^a > s_3^a > \dots > s_N^a$ .

Finally, from the definition,

$$s_1^a - s_2^a = 0.617 \sqrt{\frac{\lambda}{N}} \left( 2 \ln \left( \frac{\beta + N - 1}{1 - \beta} \right) - \sqrt{2} \ln \left( \frac{2(2\beta + N - 2)}{3(1 - \beta)} \right) \right).$$

Since  $\frac{\beta + N - 1}{1 - \beta} > \frac{2(2\beta + N - 2)}{3(1 - \beta)} > 1$ ,  $s_1^a - s_2^a > 0$ . This completes the proof.

### Proposition 7

We only prove  $s_j^a$  decreases in  $h_j$ ; the rest of the results are straightforward from (11) and (13) so the proof is omitted. To show the property, it is sufficient to show  $\xi_j$  decreases in  $h_j$ . But this is implied by

$$\frac{\partial \xi_j}{\partial h_j} = \frac{\beta(1 - \beta) \sum_{i=1}^{j-1} h_i (L_{[1,i]}/L_{[1,j]}) - h_{[1,j-1]} - h_{[j+1,N]}}{[(1 - \beta)h_j + (1 - \beta) \sum_{i=1}^{j-1} h_i (L_{[1,i]}/L_{[1,j]})]^2} < 0.$$

### Proposition 8

Without loss of generality, we assume  $h_1 = h_2 = 1$  and  $L_1 = L_2 = 1$ . From (15), this is equivalent to showing

$$\beta_2^a - \beta = \left( 1 + \left( \frac{1 + \beta}{1 - \beta} \right) \left( \frac{3(1 - \beta)}{4\beta} \right)^{\sqrt{2}} \right)^{-1} - \beta < 0$$

for  $0 < \beta < 1$ . This can be further simplified by showing

$$\frac{1 + \beta}{\beta^{\sqrt{2}-1} \cdot (1 - \beta)^{2-\sqrt{2}}} - \left( \frac{4}{3} \right)^{\sqrt{2}} \tag{16}$$

is positive. Note that the first term in (16) is a convex function of  $\beta$ ,  $0 < \beta < 1$ , and its minimizer is  $\beta = (\sqrt{2} - 1)/(3 - \sqrt{2})$ . At this minimizer, (16) achieves its lowest value  $2.626 - 1.502 > 0$ . The result follows immediately.

**Proposition 9**

We introduce a concept of *nominal fill rate* before we proceed. The nominal fill rate is the fill rate the stage would achieve if it had ample supply. Denote the nominal fill rate by using the base-stock level  $s_j^a$  at stage  $j$  to be  $\beta_j^a$ , then

$$\beta_j^a = \mathbf{P}(D_j < s_j^a).$$

Obviously, the nominal fill rate at each stage is larger than the real internal fill rate, i.e.,  $\beta_j^a \geq \beta_j^a$ , for all  $j$ .

From Proposition 6, it is easy to see that  $\beta_2^a \geq \beta_3^a \geq \dots \geq \beta_N^a$ . Note that  $\beta_j^a \leq \beta_j^a \leq \beta_2^a$ . It is sufficient to show  $\beta_2^a < \beta$  for  $\beta > \beta_0$ . From the expression

$$\begin{aligned} \beta_2^a &= \mathbf{P}(D_2 < s_2^a) \\ &= \left( 1 + \left( \frac{\beta + N - 1}{1 - \beta} \right) \left( \frac{3(1 - \beta)}{2(2\beta + N - 2)} \right)^{\sqrt{2}} \right)^{-1}, \end{aligned}$$

this is equivalent to showing

$$\left( \frac{\beta + N - 1}{1 - \beta} \right) \left( \frac{3(1 - \beta)}{2(2\beta + N - 2)} \right)^{\sqrt{2}} > \frac{1 - \beta}{\beta}, \quad \beta > \beta_0$$

or

$$w(\beta) \stackrel{def}{=} \beta(\beta + N - 1) - \left( \frac{2}{3} \right)^{\sqrt{2}} (2\beta + N - 2)^{\sqrt{2}} (1 - \beta)^{2 - \sqrt{2}} > 0, \quad \beta > \beta_0. \quad (17)$$

We now argue there indeed exists  $\beta_0$  so that (17) holds. Note that  $\lim_{\beta \rightarrow 1} w(\beta) = N$ . So, given  $\epsilon = \frac{N}{2} > 0$ , there exists  $\delta_\epsilon > 0$  such that for all  $|\beta - 1| < \delta_\epsilon$ , we have  $|w(\beta) - N| < \epsilon = \frac{N}{2}$ . This implies that, for  $\beta > \beta_0 = 1 - \delta_\epsilon$ ,  $w(\beta) > \frac{N}{2} > 0$ , proving (17).
